# Supplementary material for: Salt formation affects the conformational and assembly properties of p-carboxylatocalix[4]arenes
Source: Royal Society of Chemistry journal article supplement (doi:10.1039/c3ce42523a), 2014-01-01
Supplement: c3ce42523a1.pdf [file c3ce42523a1.pdf]

Supporting Information

**Salt formation affects the conformational and assembly properties of *p*-carboxylatocalix[4]arenes**

S. Kennedy, Christine M. Beavers, Simon J. Teat and Scott J. Dalgarno\*

Information included:

- Additional figures to aid discussion.
- Powder X-ray diffraction patterns (observed and calculated) for **7**.

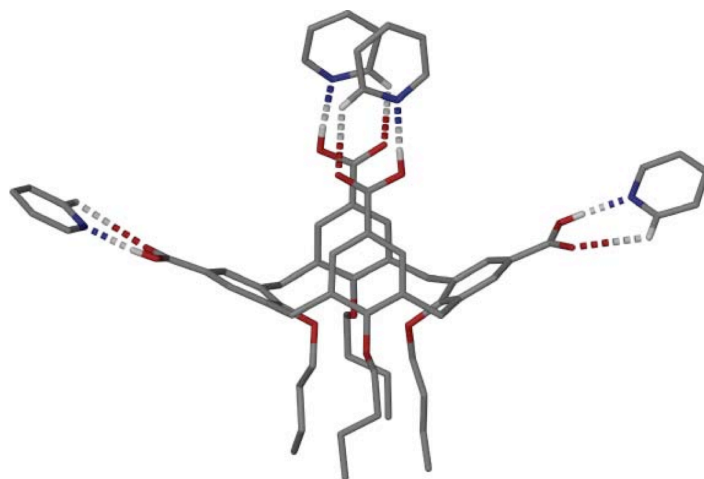

**Figure S1.** Formation of the Py...CO<sub>2</sub>H heterosynthon between tetra-*O*-butoxy *p*CO<sub>2</sub>[4] and pyridine. Note that the fully pinched-cone conformation is retained and the Py does not gain access to the potential cavity presented by the calixarene.

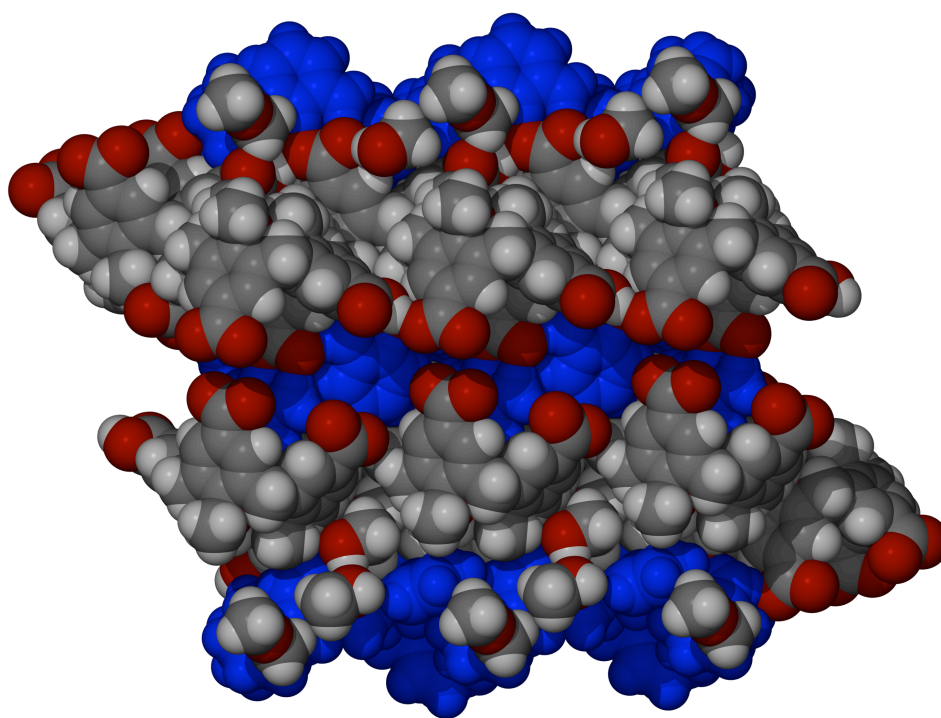

**Figure S2.** Space filling representation of the anti-parallel bi-layer packing motif found in the crystal structure of the salt formed between **1** and 2-AP (**5**). H<sub>2</sub>-AP cations are illustrated in blue, and in MeOH / **1** carbon atoms are shown in grey, oxygen atoms in red and hydrogen atoms in light grey.

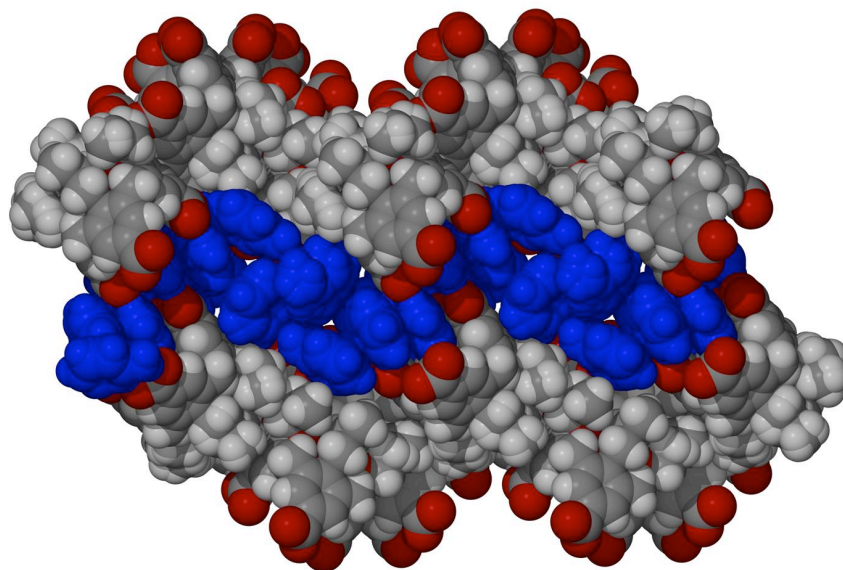

**Figure S3.** Space filling representation of the wave-like bi-layer motif found in the crystal structure of **6**. H2-AP cations are illustrated in blue. C, O and H atoms of the calixarenes are shown in grey, red and light grey respectively.

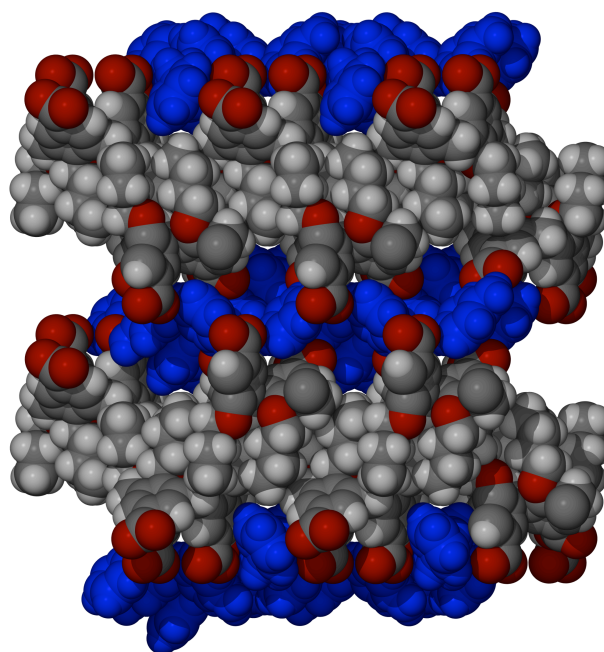

**Figure S4.** Space filling representation of the anti-parallel bi-layer array observed in the extended structure of **7**. H2-AP cations are illustrated in blue. C, O and H atoms of the calixarenes are shown in grey, red and light grey respectively.

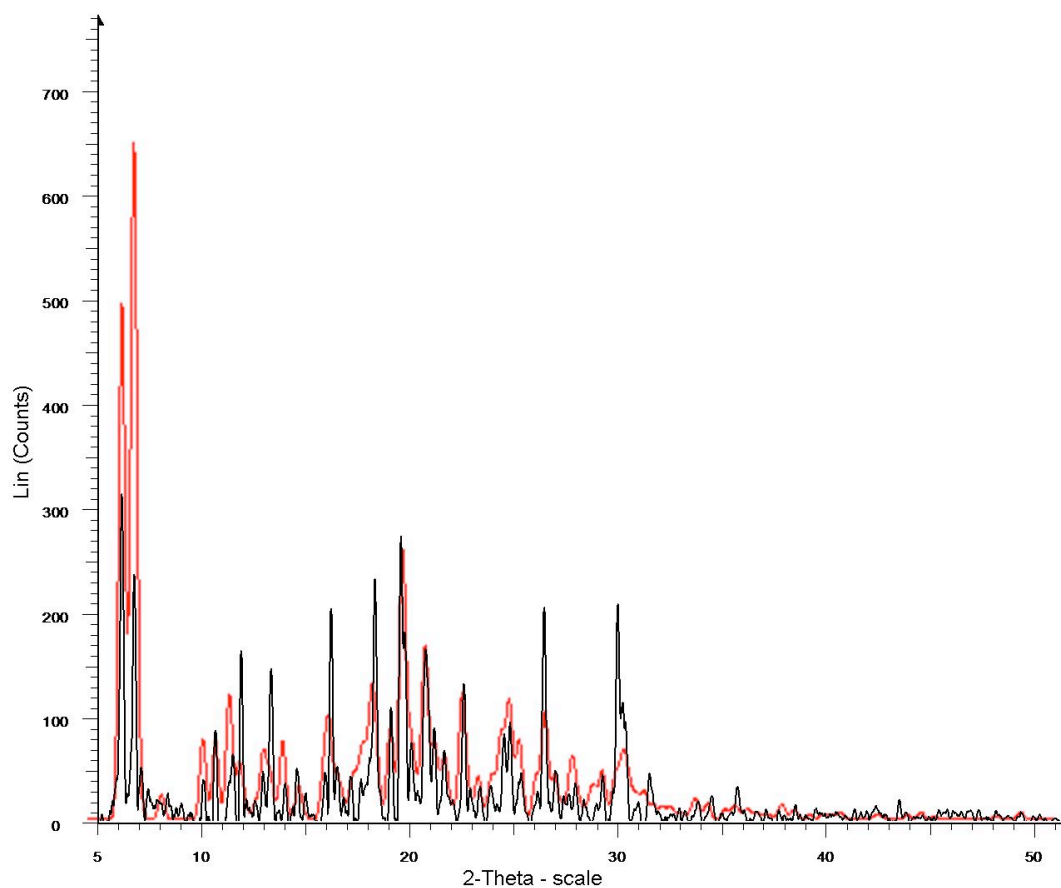

**Figure S5.** Overlay of experimental (black) and calculated (red, from single crystal structure) powder patterns for **7**.
